# Supplementary material
Source: Springer Nature journal article supplement (https://www.springermedizin.de/resource/supplementary/12913_2008_791_MOESM1_ESM.pdf/9535588)
Supplement: MOESM1 [file 9535588]

Units invited  
to participate (n=34)

Units that did not  
consent to participate  
(n=5)

Units assessed for  
eligibility (n=29)

Excluded (n=15)  
Not meeting inclusion  
criteria (n=9)  
Withdraw after project  
pre-test (n=3)  
Withdraw after project  
kick off (n=2)  
Accepted to participate  
but not sampled (n=1)

Units randomized  
(n=14)

Units enrolled to  
intervention (n=7)

Units enrolled  
to control group (n=7)
